# Supplementary material for: Effect of Bacillus aryabhattai H26-2 and B. siamensis H30-3 on Growth Promotion and Alleviation of Heat and Drought Stresses in Chinese Cabbage
Source: PubMed Central journal article supplement — Plant Pathol J. 2019 Apr 1;35(2):178–87. doi: 10.5423/PPJ.NT.08.2018.0159 (PMC6464199; doi:10.5423/ppj.nt.08.2018.0159), 2019-04-01
Supplement: ppj-35-178_suppl.pdf [file ppj-35-178_suppl.pdf]

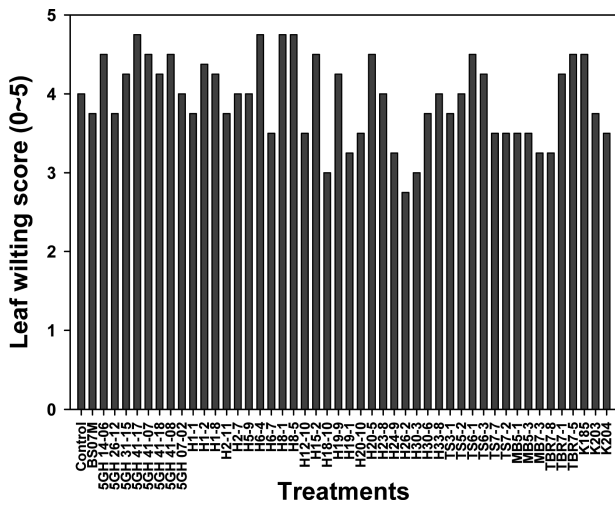

**Supplementary Fig. 1.** Leaf wilting score (0-5) after heat and drought stress in Chinese cabbage ('Buram-3-ho') treated with 46 strains.

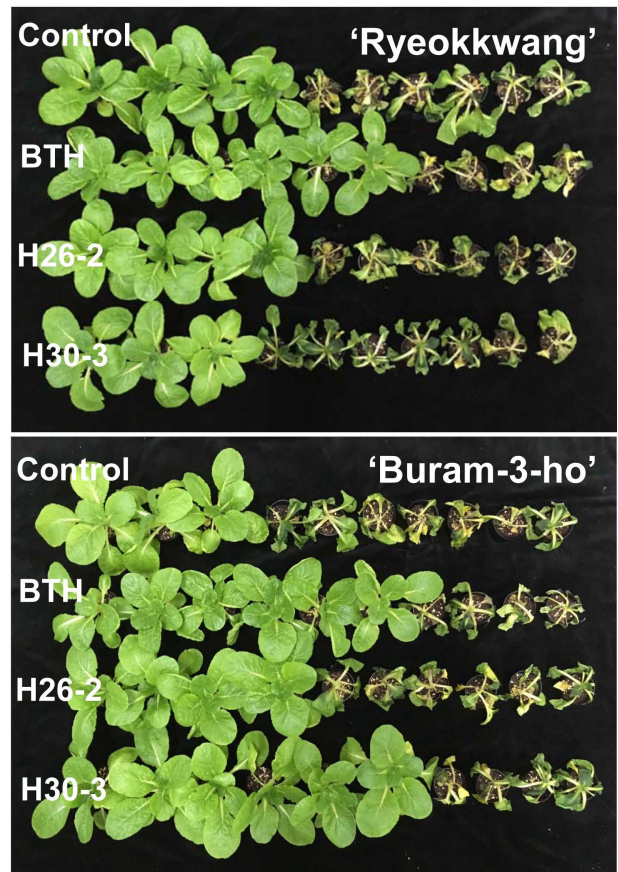

**Supplementary Fig. 3.** Soft rot caused by *Pectobacterium carotovorum* subsp. *carotovorum* PCC21 in Chinese cabbages treated with strains H26-2 and H30-3, and 10 mM MgSO<sub>4</sub> solution as untreated control.

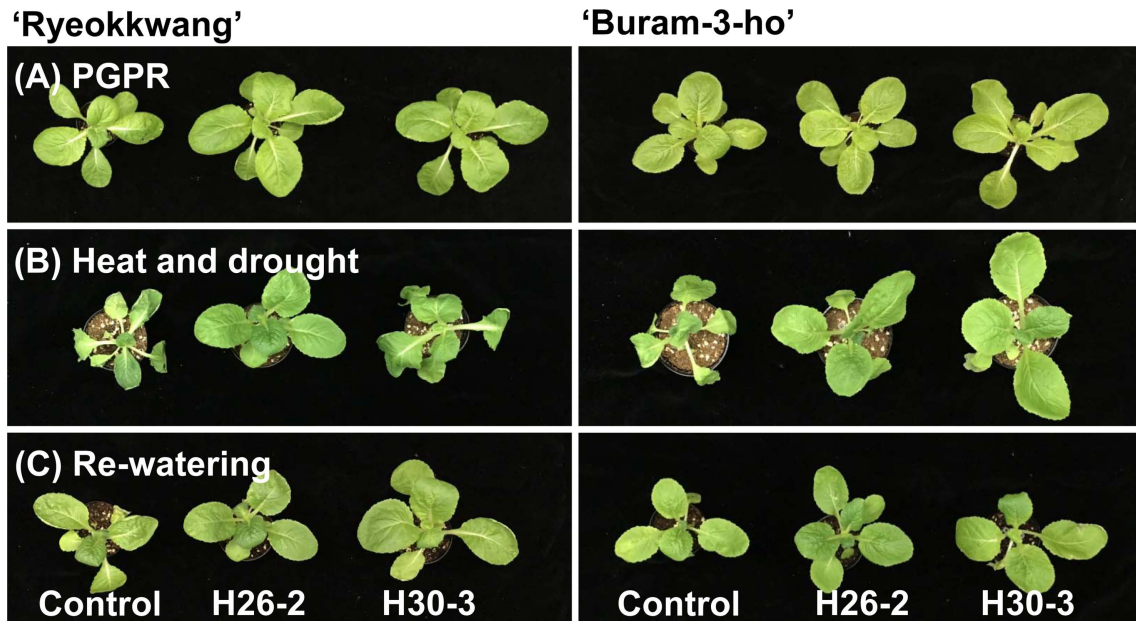

**Supplementary Fig. 2.** Pictures of two cultivars of Chinese cabbages treated with strains H26-2 and H30-3, and 10 mM MgSO<sub>4</sub> solution as untreated control. (A) Plant growth promotion, (B) heat and drought stresses, and (C) after re-watering of Chinese cabbages.
